# Supplementary material for: Interaction of myelin basic protein with cytoskeletal and signaling proteins in cultured primary oligodendrocytes and N19 oligodendroglial cells
Source: PubMed Central journal article supplement (PMC4078013; doi:10.1186/1756-0500-7-387), 2014-06-24
Supplement: 1756-0500-7-387-S1.pdf [file 1756-0500-7-387-S1.pdf]

## Supplementary Information

### Interaction of Myelin Basic Protein with Cytoskeletal and Signaling Proteins in Cultured Primary Oligodendrocytes and N19 Oligodendroglial Cells

Joan M. Boggs<sup>1,2,\*</sup>,  
Lopamudra Homchaudhuri<sup>1</sup>,  
Godha Ranagaraj<sup>1</sup>,  
Yuanfang Liu<sup>1,4</sup>  
Graham S. T. Smith<sup>3</sup>, and  
George Harauz<sup>3</sup>

<sup>1</sup>Molecular Structure and Function Program, Research Institute, Hospital for Sick Children, Toronto, Ontario, Canada;

<sup>2</sup>Department of Laboratory Medicine and Pathobiology, University of Toronto, Toronto, Ontario Canada;

<sup>3</sup>Department of Molecular and Cellular Biology, University of Guelph, Guelph, Ontario, Canada

<sup>4</sup>Present address: Neurosciences and Mental Health Program, Research Institute, Hospital for Sick Children, Toronto, Ontario, Canada.

\*To whom correspondence should be addressed: Dr. Joan M. Boggs, Molecular Structure and Function Program, Peter Gilgan Centre for Research and Learning, Research Institute, Hospital for Sick Children, 686 Bay St., Toronto, Ontario, Canada M5G 0A4. Phone: 416-813-5919; Fax: 416-813-5022; Email: [jmboggs@sickkids.ca](mailto:jmboggs@sickkids.ca).

\*To whom correspondence should be addressed: Dr. George Harauz, Molecular and Cellular Biology, University of Guelph, 50 Stone Road East, Guelph, Ontario, N1G 2W1, Canada. Phone: 519-824-4120-52535; FAX: 519-837-1802; Email: [gharauz@uoguelph.ca](mailto:gharauz@uoguelph.ca).

**Supplementary Figure S1.** Flowchart of procedures used for cell extraction, immunoprecipitation, and western blotting.

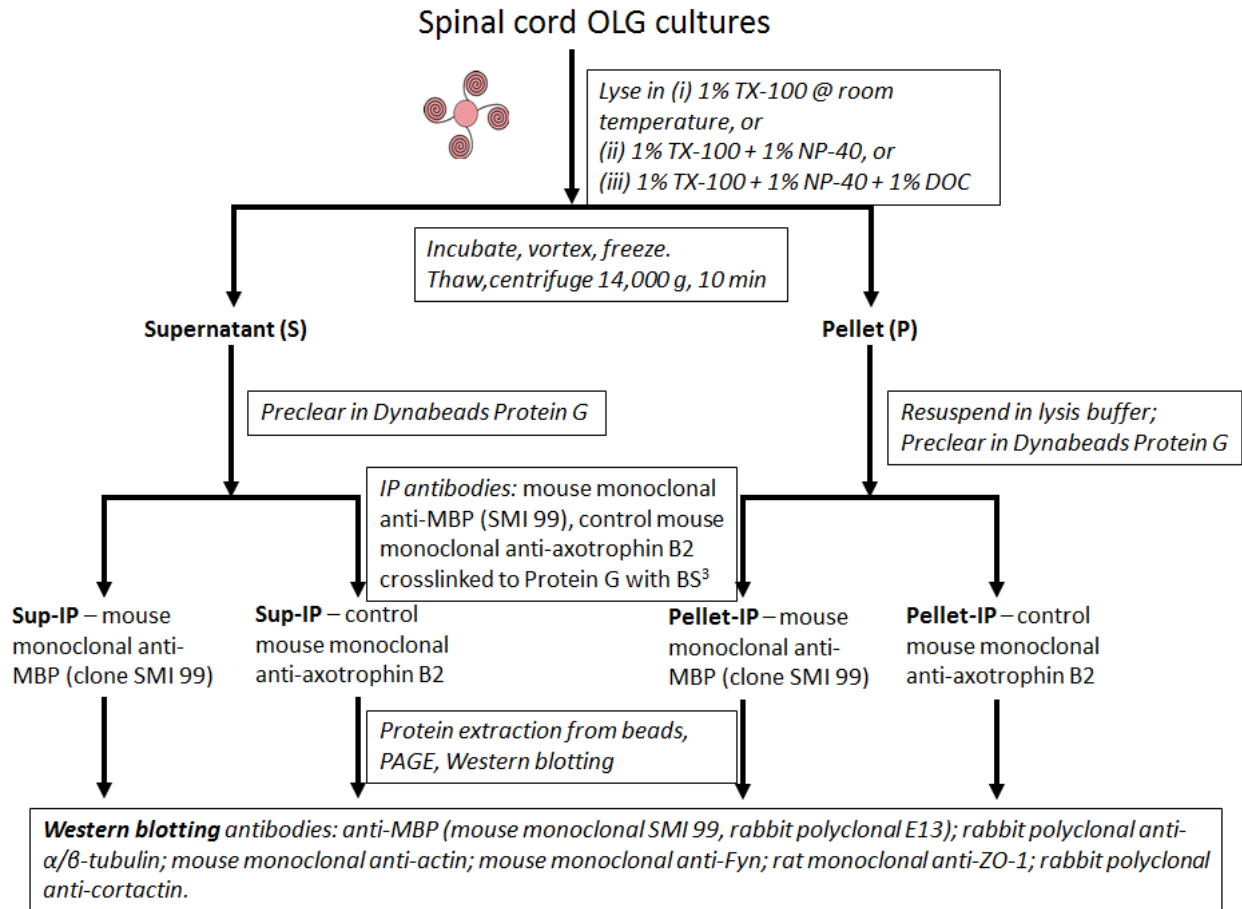

**Supplementary Table S1.** Interpretation of **Figure 1** – Western blot of primary OLGs extracted with buffer containing 1% TX-100. Samples were immunoprecipitated with anti-MBP (SMI 99) or control Abs, and detected using rabbit polyclonal anti-MBP (E13), mouse monoclonal anti-MBP (SMI 99), rabbit polyclonal anti-tubulin, and mouse monoclonal anti-actin antibodies.

(Abbreviations: “n.d.” = “not done”; “-” = “nil”; l.c. = IgG light chain; h.c. = IgG heavy chain.)

| Figure-Lane | Description            | Blotting 1 <sup>o</sup> -Ab | Detection                                  | Interpretation                                                                        |
|-------------|------------------------|-----------------------------|--------------------------------------------|---------------------------------------------------------------------------------------|
| F1-L1       | Supernatant            | MBP E13                     | 3 bands, 16, 24, 27 kDa                    | 14-, 18.5-, 21.5-kDa MBP isoforms                                                     |
|             |                        | MBP SMI 99                  | 2 bands, 24, 27 kDa                        | 18.5-, 21.5-kDa MBP isoforms                                                          |
|             |                        | Tubulin                     | 1 band, 55 kDa                             | Tubulin                                                                               |
|             |                        | Actin                       | 1 band, 45 kDa (see Fig. 2a,b)             | Actin                                                                                 |
| F1-L2       | Sup-IP anti-MBP SMI 99 | MBP E13                     | 3 bands, 16, 24, 27 kDa;<br>1band, 30 kDa  | 14-, 18.5-, 21.5-kDa MBP isoforms;<br>IgG l.c. (after reaction with BS <sup>3</sup> ) |
|             |                        | MBP SMI 99                  | 2 bands, 24, 27 kDa;<br>1 band, 30 kDa     | 18.5-, 21.5-kDa MBP isoforms;<br>IgG l.c. (after reaction with BS <sup>3</sup> )      |
|             |                        | Tubulin                     | -                                          |                                                                                       |
|             |                        | Actin                       | 1 band, 45 kDa                             | Actin                                                                                 |
| F1-L3       | Sup-IP control         | MBP E13                     | 3 bands, 16, 24, 27 kDa;<br>1 band, 30 kDa | 14-, 18.5-, 21.5-kDa MBP isoforms;<br>IgG l.c. (after reaction with BS <sup>3</sup> ) |
|             |                        | MBP SMI 99                  | 2 bands, 24, 27 kDa;<br>1 band, 30 kDa     | 18.5-, 21.5-kDa MBP isoforms;<br>IgG l.c. (after reaction with BS <sup>3</sup> )      |
|             |                        | Tubulin                     | -                                          |                                                                                       |
|             |                        | Actin                       | 1 band, 45 kDa                             | Actin                                                                                 |
| F1-L4       | Pellet                 | MBP E13                     | 3 weak bands, 16, 24, 27 kDa               | 14-, 18.5-, 21.5-kDa isoforms of MBP                                                  |
|             |                        | MBP SMI 99                  | 2 bands, 24, 27 kDa                        | 18.5-, 21.5-kDa MBP isoforms                                                          |

|       |                           |            |                                            |                                                                                    |
|-------|---------------------------|------------|--------------------------------------------|------------------------------------------------------------------------------------|
|       |                           | Tubulin    | 1 band, 55 kDa                             | Tubulin                                                                            |
|       |                           | Actin      | 1 band, 45 kDa                             | Actin                                                                              |
| F1-L5 | Pellet-IP anti-MBP SMI 99 | MBP E13    | 3 bands, 16, 24, 27 kDa;<br>1 band, 30 kDa | 14-, 18.5-, 21.5-kDa MBP isoforms; IgG l.c. (after reaction with BS <sup>3</sup> ) |
|       |                           | MBP SMI 99 | 2 bands, 24, 27 kDa;<br>1 band, 30 kDa     | 18.5-, 21.5-kDa MBP isoforms; IgG l.c. (after reaction with BS <sup>3</sup> )      |
|       |                           | Tubulin    | 1 band, 55 kDa                             | Tubulin                                                                            |
|       |                           | Actin      | 1 band, 45 kDa                             | Actin                                                                              |
| F1-L6 | Pellet-IP control         | MBP E13    | 4 weak bands, 16, 24, 27, 30 kDa           | 14-, 18.5-, 21.5-kDa MBP isoforms; IgG l.c. (reacted with BS <sup>3</sup> )        |
|       |                           | MBP SMI 99 | 3 bands, 24, 27, 30 kDa                    | 18.5-, 21.5-kDa MBP isoforms; IgG l.c. (reacted with BS <sup>3</sup> )             |
|       |                           | Tubulin    | -                                          |                                                                                    |
|       |                           | Actin      | 1 band, 45 kDa                             | Actin                                                                              |
| F1-L7 | IgG anti-MBP SMI 99       | MBP E13    | -                                          |                                                                                    |
|       |                           | MBP SMI 99 | -                                          |                                                                                    |
|       |                           | Tubulin    | -                                          |                                                                                    |
|       |                           | Actin      | 1 band, 55 kDa                             | IgG h.c.                                                                           |
| F1-L8 | IgG control               | MBP E13    | -                                          |                                                                                    |
|       |                           | MBP SMI 99 | 1 band, 28 kDa                             | IgG l.c.                                                                           |
|       |                           | Tubulin    | -                                          |                                                                                    |
|       |                           | Actin      | 1 band, 55 kDa                             | IgG h.c.                                                                           |

**Supplementary Table S2.** Interpretation of **Figure 2(a,b)** – Western blot of primary OLGs extracted with buffer containing 1% TX-100 plus 1% NP40. Samples were immunoprecipitated with anti-MBP (SMi 99) or a control Ab, and detected using rabbit polyclonal anti-MBP (E13), rabbit polyclonal anti-tubulin, mouse monoclonal anti-actin, rat monoclonal anti-ZO-1, and mouse monoclonal anti-Fyn antibodies.

(Abbreviations: “n.d.” = “not done”; “-” = “nil”; l.c. = IgG light chain; h.c. = IgG heavy chain; 1<sup>o</sup>-Ab = primary antibody.)

| Figure-Lane | Description            | Blotting 1 <sup>o</sup> -Ab | Detection                              | Interpretation                      |
|-------------|------------------------|-----------------------------|----------------------------------------|-------------------------------------|
| F2-L1       | Standard               | MBP E13                     | 1 band, 24 kDa                         | 18.5-kDa MBP                        |
|             |                        | Tubulin                     | 1 band, 55 kDa                         | Tubulin                             |
|             |                        | Actin                       | 1 band, 45 kDa                         | Actin                               |
|             |                        | ZO-1                        | n.d.                                   |                                     |
|             |                        | Fyn                         | n.d.                                   |                                     |
| F2-L2       | Supernatant            | MBP E13                     | 4 bands, 16, 23, 24, 27 kDa            | 14-, 17-, 18.5-, 21.5-MBP isoforms  |
|             |                        | Tubulin                     | 1 band, 55 kDa                         | Tubulin                             |
|             |                        | Actin                       | 1 band, 45 kDa                         | Actin                               |
|             |                        | ZO-1                        | several bands, 140-220 kDa             | ZO-1 isoforms                       |
|             |                        | Fyn                         | 1 band, 60 kDa                         | Fyn                                 |
| F2-L3       | Sup-IP anti-MBP SMI 99 | MBP E13                     | 4 bands, 16, 23, 24, 27 kDa            | 14-, 17-, 18.5-, 21.5-MBP isoforms  |
|             |                        | Tubulin                     | 1 band, 55 kDa                         | Tubulin                             |
|             |                        | Actin                       | 1 band, 45 kDa                         | Actin                               |
|             |                        | ZO-1                        | several bands, 140-220 kDa             | ZO-1 isoforms                       |
|             |                        | Fyn                         | 1 band, 60 kDa                         | Fyn                                 |
| F2-L4       | Sup-IP control         | MBP                         | 2 bands, 16, 24 kDa                    | 14-, 18.5-kDa MBP isoforms          |
|             |                        | Tubulin                     | 1 weak band, 55 kDa                    | Tubulin                             |
|             |                        | Actin                       | 1 band, 45 kDa                         | Actin                               |
|             |                        | ZO-1                        | 1 band, 220 kDa                        | ZO-1 isoform                        |
|             |                        | Fyn                         | 1 weak band, 60 kDa;<br>1 band, 75 kDa | Fyn;<br>crosslinked IgG l.c. + h.c. |
| F2-L5       | Pellet                 | MBP                         | 3 weak bands, 23, 24, 27 kDa           | 17-, 18.5-, 21.5-kDa MBP isoforms   |
|             |                        | Tubulin                     | 1 band, 55 kDa                         | Tubulin                             |
|             |                        | Actin                       | 1 band, 45 kDa                         | Actin                               |
|             |                        | ZO-1                        | 1 band, 220 kDa                        | ZO-1 isoform                        |

|       |                           |         |                                   |                                        |
|-------|---------------------------|---------|-----------------------------------|----------------------------------------|
|       |                           | Fyn     | 1 band, 60 kDa                    | Fyn                                    |
| F2-L6 | Pellet-IP anti-MBP SMI 99 | MBP     | 4 bands, 16, 23, 24, 27 kDa       | 14-, 17-, 18.5-, 21.5-kDa MBP isoforms |
|       |                           | Tubulin | 1 band, 55 kDa                    | Tubulin                                |
|       |                           | Actin   | 1 band, 45 kDa                    | Actin                                  |
|       |                           | ZO-1    | several bands, 140-220 kDa        | ZO-1 isoforms                          |
|       |                           | Fyn     | 1 band, 60 kDa                    | Fyn                                    |
| F2-L7 | Pellet-IP control         | MBP     | 4 bands, 16, 23, 24, 27 kDa       | 14-, 17-, 18.5-, 21.5-kDa MBP isoforms |
|       |                           | Tubulin | 1 band, 55 kDa                    | Tubulin                                |
|       |                           | Actin   | 1 band, 45 kDa                    | Actin                                  |
|       |                           | ZO-1    | 1 band, 220 kDa                   | ZO-1 isoform                           |
|       |                           | Fyn     | 1 band, 60 kDa;<br>1 band, 75 kDa | Fyn;<br>crosslinked IgG l.c. + h.c.    |
| F2-L8 | IgG anti-MBP SMI 99       | MBP     | -                                 |                                        |
|       |                           | Tubulin | -                                 |                                        |
|       |                           | Actin   | 1 band, 55 kDa                    | IgG h.c.                               |
|       |                           | ZO-1    | -                                 |                                        |
|       |                           | Fyn     | 1 band, 55 kDa                    | IgG h.c.                               |
| F2-L9 | IgG control               | MBP     | -                                 |                                        |
|       |                           | Tubulin | -                                 |                                        |
|       |                           | Actin   | 1 band, 55 kDa                    | IgG h.c.                               |
|       |                           | ZO-1    | -                                 |                                        |
|       |                           | Fyn     | 1 band, 55 kDa                    | IgG h.c.                               |

**Supplementary Table S3.** Interpretation of **Figure 3** – Western blot of primary OLGs extracted with buffer containing 1% TX-100 plus 1% NP40. Samples were immunoprecipitated using mouse monoclonal anti-MBP (SMI 99) or control antibodies, and detected using rabbit polyclonal anti-cortactin antibody.

(Abbreviations: “n.d.” = “not done”; “-“ = “nil”.)

| <b>Figure-Lane</b> | <b>Description</b>        | <b>Blotting 1<sup>o</sup>-Ab</b> | <b>Detection</b>         | <b>Interpretation</b> |
|--------------------|---------------------------|----------------------------------|--------------------------|-----------------------|
| F3-L1              | Supernatant               | cortactin                        | 2 bands, 78, 82 kDa      | cortactin isoforms    |
| F3-L2              | Blank                     | cortactin                        | -                        |                       |
| F3-L3              | Pellet                    | cortactin                        | 2 bands, 78, 82 kDa      | cortactin isoforms    |
| F3-L4              | Sup-IP anti-MBP SMI 99    | cortactin                        | 2 bands, 78, 82 kDa      | cortactin isoforms    |
| F3-L5              | Sup-IP control            | cortactin                        | 2 weak bands, 78, 82 kDa | cortactin isoforms    |
| F3-L6              | Blank                     | cortactin                        | -                        |                       |
| F3-L7              | Pellet-IP anti-MBP SMI 99 | cortactin                        | 2 bands, 78, 82 kDa      | cortactin isoforms    |
| F3-L8              | Pellet-IP control         | cortactin                        | 2 bands, 78, 82 kDa      | cortactin isoforms    |
| F3-L9              | IgG anti-MBP SMI 99       | cortactin                        | -                        |                       |
| F3-L10             | IgG control               |                                  | -                        |                       |

**Supplementary Table S4.** Interpretation of **Figure 4** – Western blot of primary OLGs extracted with buffer containing 1% TX-100 plus 1% NP40 plus 1% DOC. Samples were immunoprecipitated with monoclonal anti-MBP (SMI 99) or control antibodies, and detected using rabbit polyclonal anti-MBP (E13), rabbit polyclonal anti-tubulin, mouse monoclonal anti-actin, and rat monoclonal anti-ZO-1 antibodies.

(Abbreviations: “n.d.” = “not done”; “-” = “nil”.)

| Figure-Lane | Description               | Blotting 1 <sup>o</sup> -Ab | Detection                             | Interpretation                                                                  |
|-------------|---------------------------|-----------------------------|---------------------------------------|---------------------------------------------------------------------------------|
| F4-L1       | Standard                  | MBP                         | 1 band, 24 kDa                        | 18.5 kDa MBP isoform                                                            |
|             |                           | Tubulin                     | 1 band, 55 kDa                        | Tubulin                                                                         |
|             |                           | Actin                       | 1 band, 45 kDa (see Fig. 2)           | Actin                                                                           |
|             |                           | ZO-1                        | n.d.                                  |                                                                                 |
| F4-L2       | Supernatant               | MBP                         | 3 bands, 16, 24, 27 kDa               | 14, 18.5, 21.5 kDa MBP isoforms                                                 |
|             |                           | Tubulin                     | 1 heavy band, 55 kDa                  | Tubulin                                                                         |
|             |                           | Actin                       | 1 heavy band, 45 kDa                  | Actin                                                                           |
|             |                           | ZO-1                        | 3 bands, 140-220 kDa                  | ZO-1 isoforms                                                                   |
| F4-L3       | Sup-IP anti-MBP SMI 99    | MBP                         | 2 bands, 24, 27 kDa;<br>1 band 30 kDa | 18.5, 21.5 kDa MBP isoforms;<br>IgG l.c. (after reaction with BS <sup>3</sup> ) |
|             |                           | Tubulin                     | -                                     |                                                                                 |
|             |                           | Actin                       | 1 weak band, 45 kDa                   | Actin                                                                           |
|             |                           | ZO-1                        | -                                     |                                                                                 |
| F4-L4       | Sup-IP control            | MBP                         | 1 band, 30 kDa                        | IgG l.c. (after reaction with BS <sup>3</sup> )                                 |
|             |                           | Tubulin                     | -                                     |                                                                                 |
|             |                           | Actin                       | 1 weak band, 45 kDa                   | Actin                                                                           |
|             |                           | ZO-1                        | -                                     |                                                                                 |
| F4-L5       | Pellet                    | MBP                         | 3 weak bands, 16, 24, 27 kDa          | 14, 18.5, 21.5 kDa MBP isoforms                                                 |
|             |                           | Tubulin                     | 1 band, 55 kDa                        | Tubulin                                                                         |
|             |                           | Actin                       | 1 band, 45 kDa                        | Actin                                                                           |
|             |                           | ZO-1                        | -                                     |                                                                                 |
| F4-L6       | Pellet-IP anti-MBP SMI 99 | MBP                         | 1 band, 30 kDa                        | IgG l.c. (after reaction with BS <sup>3</sup> )                                 |



|       |                     |         |                |                                                 |
|-------|---------------------|---------|----------------|-------------------------------------------------|
|       |                     | Tubulin | -              |                                                 |
|       |                     | Actin   | -              |                                                 |
|       |                     | ZO-1    | -              |                                                 |
| F4-L7 | Pellet-IP control   | MBP     | 1 band, 30 kDa | IgG l.c. (after reaction with BS <sup>3</sup> ) |
|       |                     | Tubulin | -              |                                                 |
|       |                     | Actin   | -              |                                                 |
|       |                     | ZO-1    | -              |                                                 |
| F4-L8 | IgG anti-MBP SMI 99 | MBP     | -              |                                                 |
|       |                     | Tubulin | -              |                                                 |
|       |                     | Actin   | -              |                                                 |
|       |                     | ZO-1    | -              |                                                 |
| F4-L9 | IgG control         | MBP     | -              |                                                 |
|       |                     | Tubulin | -              |                                                 |
|       |                     | Actin   | -              |                                                 |
|       |                     | ZO-1    | -              |                                                 |
